# Supplementary material for: FTO Genetic Variation and Association With Obesity in West Africans and African Americans
Source: PubMed Central journal article supplement — Diabetes. 2010 Mar 18;59(6):1549–54. doi: 10.2337/db09-1252 (PMC2874717; doi:10.2337/db09-1252), 2010-03-18

ONLINE APPENDIX

**FTO Genetic Variation and Association with Obesity in West Africans and African-Americans**

**Supplementary Table 1**

**List of the 262 SNPS studied in the two samples**

| #  | SNP name   | Position (bp) | Alleles | MAF (West Africans) | MAF (African Americans) | d     |
|----|------------|---------------|---------|---------------------|-------------------------|-------|
| 1  | rs1421092  | 52291722      | G:A     | 0.426               | 0.415                   | 0.011 |
| 2  | rs4783818  | 52295784      | A:T     | 0.234               | 0.18                    | 0.054 |
| 3  | rs7187609  | 52296699      | T:C     | 0.259               | 0.236                   | 0.023 |
| 4  | rs13335169 | 52297500      | C:T     | 0.211               | 0.167                   | 0.044 |
| 5  | rs16952465 | 52308884      | G:A     | 0.177               | 0.137                   | 0.04  |
| 6  | rs7206010  | 52312678      | G:A     | 0.363               | 0.385                   | 0.022 |
| 7  | rs1421084  | 52315241      | A:G     | 0.324               | 0.274                   | 0.05  |
| 8  | rs4386132  | 52316624      | C:T     | 0.032               | 0.047                   | 0.015 |
| 9  | rs7200857  | 52321110      | C:G     | 0.232               | 0.193                   | 0.039 |
| 10 | rs9925311  | 52325149      | G:A     | 0.112               | 0.098                   | 0.014 |
| 11 | rs7203521  | 52326794      | A:G     | 0.344               | 0.36                    | 0.016 |
| 12 | rs16952479 | 52328079      | A:T     | 0.033               | 0.044                   | 0.011 |
| 13 | rs16952482 | 52329084      | T:C     | 0.119               | 0.125                   | 0.006 |
| 14 | rs4396532  | 52330548      | G:A     | 0.25                | 0.235                   | 0.015 |
| 15 | rs9933611  | 52331386      | A:G     | 0.075               | 0.063                   | 0.012 |
| 16 | rs16952495 | 52334521      | A:C     | 0.034               | 0.035                   | 0.001 |
| 17 | rs16952502 | 52336332      | A:G     | 0.026               | 0.026                   | 0     |
| 18 | rs7186637  | 52337603      | C:T     | 0.447               | 0.391                   | 0.056 |
| 19 | rs16952508 | 52346159      | A:G     | 0.067               | 0.049                   | 0.018 |
| 20 | rs1108102  | 52347009      | T:A     | 0.186               | 0.142                   | 0.044 |
| 21 | rs1861868  | 52347903      | G:A     | 0.207               | 0.261                   | 0.054 |
| 22 | rs1075440  | 52348407      | A:G     | 0.061               | 0.105                   | 0.044 |
| 23 | rs1077128  | 52349154      | T:G     | 0.389               | 0.46                    | 0.071 |
| 24 | rs7184874  | 52349940      | C:T     | 0.228               | 0.278                   | 0.05  |
| 25 | rs7186521  | 52350423      | A:G     | 0.36                | 0.414                   | 0.054 |
| 26 | rs9932576  | 52350499      | G:A     | 0.048               | 0.059                   | 0.011 |
| 27 | rs13333228 | 52351299      | C:T     | 0.044               | 0.09                    | 0.046 |
| 28 | rs13334933 | 52353137      | G:A     | 0.295               | 0.392                   | 0.097 |
| 29 | rs13336126 | 52353566      | T:C     | 0.063               | 0.053                   | 0.01  |
| 30 | rs16952517 | 52354558      | G:A     | 0.172               | 0.187                   | 0.015 |
| 31 | rs6499643  | 52355019      | T:C     | 0.431               | 0.39                    | 0.041 |
| 32 | rs7206790  | 52355409      | G:C     | 0.378               | 0.417                   | 0.039 |
| 33 | rs8047395  | 52356024      | A:G     | 0.247               | 0.297                   | 0.05  |
| 34 | rs16952520 | 52360539      | A:G     | 0.323               | 0.261                   | 0.062 |
| 35 | rs8055197  | 52360657      | A:G     | 0.202               | 0.276                   | 0.074 |
| 36 | rs12447107 | 52362593      | G:C     | 0.361               | 0.295                   | 0.066 |
| 37 | rs17817288 | 52365265      | A:G     | 0.399               | 0.403                   | 0.004 |
| 38 | rs9924817  | 52365425      | G:A     | 0.022               | 0.018                   | 0.004 |
| 39 | rs1477196  | 52365759      | G:A     | 0.033               | 0.097                   | 0.064 |

|    |            |          |     |       |       |       |
|----|------------|----------|-----|-------|-------|-------|
| 40 | rs16952523 | 52366195 | G:A | 0.059 | 0.043 | 0.016 |
| 41 | rs16952524 | 52366485 | C:A | 0.086 | 0.057 | 0.029 |
| 42 | rs1121980  | 52366748 | C:T | 0.491 | 0.467 | 0.024 |
| 43 | rs16952525 | 52367515 | A:G | 0.077 | 0.077 | 0     |
| 44 | rs16945088 | 52370025 | A:G | 0.36  | 0.314 | 0.046 |
| 45 | rs8057044  | 52370115 | A:G | 0.203 | 0.27  | 0.067 |
| 46 | rs17817449 | 52370868 | T:G | 0.409 | 0.396 | 0.013 |
| 47 | rs8063946  | 52370999 | C:T | 0.41  | 0.341 | 0.069 |
| 48 | rs8054237  | 52373366 | G:A | 0.355 | 0.286 | 0.069 |
| 49 | rs9939609  | 52378028 | A:T | 0.496 | 0.533 | 0.037 |
| 50 | rs9941349  | 52382989 | C:T | 0.165 | 0.187 | 0.022 |
| 51 | rs17817964 | 52385567 | C:T | 0.053 | 0.111 | 0.058 |
| 52 | rs13337696 | 52386693 | C:T | 0.053 | 0.047 | 0.006 |
| 53 | rs7204609  | 52391106 | T:C | 0.445 | 0.363 | 0.082 |
| 54 | rs8044769  | 52396636 | C:T | 0.152 | 0.236 | 0.084 |
| 55 | rs1115005  | 52401795 | C:T | 0.117 | 0.093 | 0.024 |
| 56 | rs16952545 | 52403174 | G:A | 0.022 | 0.025 | 0.003 |
| 57 | rs9935403  | 52404427 | G:A | 0.228 | 0.177 | 0.051 |
| 58 | rs1861867  | 52406062 | C:T | 0.073 | 0.147 | 0.074 |
| 59 | rs11075994 | 52407580 | G:A | 0.125 | 0.173 | 0.048 |
| 60 | rs1421090  | 52407671 | T:C | 0.334 | 0.299 | 0.035 |
| 61 | rs6499647  | 52408042 | T:C | 0.053 | 0.04  | 0.013 |
| 62 | rs9939811  | 52408369 | C:T | 0.47  | 0.531 | 0.061 |
| 63 | rs9940463  | 52409308 | A:C | 0.105 | 0.079 | 0.026 |
| 64 | rs9935366  | 52410916 | C:T | 0.362 | 0.386 | 0.024 |
| 65 | rs17219084 | 52413101 | A:G | 0.18  | 0.225 | 0.045 |
| 66 | rs10852522 | 52416278 | T:A | 0.383 | 0.375 | 0.008 |
| 67 | rs7195539  | 52416659 | A:G | 0.19  | 0.146 | 0.044 |
| 68 | rs8061518  | 52418525 | A:G | 0.437 | 0.458 | 0.021 |
| 69 | rs6499648  | 52418640 | T:C | 0.18  | 0.166 | 0.014 |
| 70 | rs16952570 | 52423231 | T:C | 0.125 | 0.113 | 0.012 |
| 71 | rs16952577 | 52425817 | T:G | 0.492 | 0.542 | 0.05  |
| 72 | rs1344501  | 52429543 | A:G | 0.386 | 0.373 | 0.013 |
| 73 | rs7188300  | 52431960 | G:A | 0.259 | 0.293 | 0.034 |
| 74 | rs6499652  | 52432081 | T:C | 0.33  | 0.366 | 0.036 |
| 75 | rs17219983 | 52432419 | C:T | 0.426 | 0.467 | 0.041 |
| 76 | rs2111115  | 52432517 | C:T | 0.152 | 0.217 | 0.065 |
| 77 | rs8053740  | 52433213 | C:G | 0.444 | 0.451 | 0.007 |
| 78 | rs6499653  | 52435093 | T:C | 0.423 | 0.51  | 0.087 |
| 79 | rs12447581 | 52439374 | G:C | 0.142 | 0.162 | 0.02  |
| 80 | rs8061228  | 52439872 | T:C | 0.497 | 0.499 | 0.002 |
| 81 | rs2111114  | 52440953 | A:G | 0.186 | 0.217 | 0.031 |
| 82 | rs2160481  | 52441614 | T:C | 0.147 | 0.169 | 0.022 |
| 83 | rs12596457 | 52442515 | G:C | 0.224 | 0.268 | 0.044 |
| 84 | rs16952587 | 52444120 | G:C | 0.162 | 0.142 | 0.02  |
| 85 | rs9936768  | 52457064 | C:T | 0.321 | 0.272 | 0.049 |

|     |            |          |     |       |       |       |
|-----|------------|----------|-----|-------|-------|-------|
| 86  | rs8044353  | 52462657 | G:A | 0.468 | 0.395 | 0.073 |
| 87  | rs10521304 | 52466158 | A:G | 0.103 | 0.181 | 0.078 |
| 88  | rs1362571  | 52469271 | A:C | 0.208 | 0.24  | 0.032 |
| 89  | rs8061064  | 52469865 | A:T | 0.463 | 0.475 | 0.012 |
| 90  | rs8061239  | 52469967 | C:T | 0.417 | 0.417 | 0     |
| 91  | rs9931209  | 52470388 | T:G | 0.142 | 0.12  | 0.022 |
| 92  | rs9934504  | 52474380 | G:A | 0.252 | 0.228 | 0.024 |
| 93  | rs16952619 | 52476148 | A:G | 0.178 | 0.16  | 0.018 |
| 94  | rs13336857 | 52476945 | T:A | 0.116 | 0.091 | 0.025 |
| 95  | rs16952624 | 52480339 | C:T | 0.041 | 0.024 | 0.017 |
| 96  | rs17820875 | 52484291 | A:G | 0.077 | 0.088 | 0.011 |
| 97  | rs11076008 | 52484824 | A:G | 0.224 | 0.323 | 0.099 |
| 98  | rs9926180  | 52486108 | T:A | 0.339 | 0.423 | 0.084 |
| 99  | rs2111113  | 52488108 | G:C | 0.236 | 0.188 | 0.048 |
| 100 | rs7500562  | 52488391 | G:C | 0.487 | 0.445 | 0.042 |
| 101 | rs1362570  | 52491048 | A:G | 0.477 | 0.404 | 0.073 |
| 102 | rs17222465 | 52493954 | C:A | 0.151 | 0.174 | 0.023 |
| 103 | rs7196299  | 52496416 | A:G | 0.139 | 0.113 | 0.026 |
| 104 | rs10852525 | 52496582 | G:A | 0.228 | 0.191 | 0.037 |
| 105 | rs9929152  | 52496904 | G:A | 0.318 | 0.398 | 0.08  |
| 106 | rs8056040  | 52499645 | A:G | 0.065 | 0.073 | 0.008 |
| 107 | rs12921721 | 52500740 | T:C | 0.492 | 0.522 | 0.03  |
| 108 | rs7186419  | 52501930 | G:A | 0.122 | 0.1   | 0.022 |
| 109 | rs11861220 | 52502755 | C:T | 0.071 | 0.045 | 0.026 |
| 110 | rs12708942 | 52503705 | T:A | 0.273 | 0.23  | 0.043 |
| 111 | rs9806929  | 52507417 | G:A | 0.182 | 0.167 | 0.015 |
| 112 | rs7197167  | 52508854 | G:T | 0.361 | 0.439 | 0.078 |
| 113 | rs1344503  | 52510447 | C:T | 0.259 | 0.233 | 0.026 |
| 114 | rs7193851  | 52510646 | T:C | 0.318 | 0.305 | 0.013 |
| 115 | rs8053966  | 52511499 | C:T | 0.481 | 0.531 | 0.05  |
| 116 | rs7194336  | 52512164 | T:G | 0.348 | 0.348 | 0     |
| 117 | rs16952649 | 52513553 | C:T | 0.266 | 0.27  | 0.004 |
| 118 | rs12932428 | 52518028 | T:C | 0.359 | 0.401 | 0.042 |
| 119 | rs4783826  | 52518855 | A:G | 0.412 | 0.424 | 0.012 |
| 120 | rs4784331  | 52519268 | T:A | 0.348 | 0.388 | 0.04  |
| 121 | rs9924072  | 52523564 | G:A | 0.148 | 0.232 | 0.084 |
| 122 | rs4784333  | 52526589 | G:C | 0.411 | 0.455 | 0.044 |
| 123 | rs8050152  | 52529016 | C:A | 0.199 | 0.139 | 0.06  |
| 124 | rs7197260  | 52530548 | G:A | 0.092 | 0.075 | 0.017 |
| 125 | rs10521302 | 52532942 | C:T | 0.464 | 0.48  | 0.016 |
| 126 | rs16952662 | 52536347 | G:A | 0.132 | 0.118 | 0.014 |
| 127 | rs16952663 | 52536601 | G:A | 0.075 | 0.084 | 0.009 |
| 128 | rs7206337  | 52538098 | C:G | 0.241 | 0.216 | 0.025 |
| 129 | rs9924877  | 52538922 | G:A | 0.089 | 0.155 | 0.066 |
| 130 | rs7197239  | 52540250 | A:G | 0.273 | 0.242 | 0.031 |
| 131 | rs7203181  | 52540981 | A:C | 0.225 | 0.293 | 0.068 |

|     |            |          |     |       |       |       |
|-----|------------|----------|-----|-------|-------|-------|
| 132 | rs7202103  | 52541456 | G:T | 0.195 | 0.141 | 0.054 |
| 133 | rs12925189 | 52542774 | G:A | 0.041 | 0.138 | 0.097 |
| 134 | rs7192822  | 52543722 | T:C | 0.197 | 0.187 | 0.01  |
| 135 | rs7201444  | 52546012 | A:C | 0.465 | 0.404 | 0.061 |
| 136 | rs16952686 | 52547174 | A:G | 0.136 | 0.107 | 0.029 |
| 137 | rs7185479  | 52547240 | A:C | 0.076 | 0.09  | 0.014 |
| 138 | rs7191513  | 52548024 | A:G | 0.424 | 0.481 | 0.057 |
| 139 | rs17822953 | 52549517 | G:C | 0.098 | 0.09  | 0.008 |
| 140 | rs1111484  | 52550693 | A:G | 0.024 | 0.021 | 0.003 |
| 141 | rs1861555  | 52551968 | G:A | 0.206 | 0.144 | 0.062 |
| 142 | rs11644943 | 52553085 | T:A | 0.182 | 0.165 | 0.017 |
| 143 | rs12446047 | 52554803 | C:T | 0.294 | 0.333 | 0.039 |
| 144 | rs13335646 | 52556188 | C:G | 0.116 | 0.093 | 0.023 |
| 145 | rs17823199 | 52556431 | C:T | 0.46  | 0.47  | 0.01  |
| 146 | rs7199210  | 52558089 | A:C | 0.268 | 0.21  | 0.058 |
| 147 | rs1111483  | 52558408 | T:G | 0.25  | 0.279 | 0.029 |
| 148 | rs16952703 | 52559834 | A:C | 0.105 | 0.082 | 0.023 |
| 149 | rs8053888  | 52561306 | T:C | 0.48  | 0.464 | 0.016 |
| 150 | rs9940629  | 52562312 | G:A | 0.466 | 0.434 | 0.032 |
| 151 | rs9932411  | 52562664 | C:T | 0.212 | 0.309 | 0.097 |
| 152 | rs7206456  | 52562990 | G:A | 0.124 | 0.144 | 0.02  |
| 153 | rs7185783  | 52565323 | T:G | 0.279 | 0.404 | 0.125 |
| 154 | rs9302654  | 52567046 | C:T | 0.171 | 0.17  | 0.001 |
| 155 | rs4784335  | 52567189 | T:G | 0.178 | 0.228 | 0.05  |
| 156 | rs16952725 | 52571768 | G:C | 0.051 | 0.042 | 0.009 |
| 157 | rs16952728 | 52572144 | C:G | 0.132 | 0.107 | 0.025 |
| 158 | rs17225435 | 52573953 | A:G | 0.045 | 0.06  | 0.015 |
| 159 | rs16952730 | 52576422 | G:A | 0.255 | 0.262 | 0.007 |
| 160 | rs12324955 | 52577187 | G:A | 0.488 | 0.503 | 0.015 |
| 161 | rs9935296  | 52577525 | T:C | 0.167 | 0.114 | 0.053 |
| 162 | rs1125392  | 52577646 | C:T | 0.486 | 0.551 | 0.065 |
| 163 | rs8049235  | 52578510 | A:G | 0.489 | 0.472 | 0.017 |
| 164 | rs9933107  | 52581017 | G:T | 0.318 | 0.307 | 0.011 |
| 165 | rs4784337  | 52581767 | G:A | 0.121 | 0.128 | 0.007 |
| 166 | rs8056199  | 52582673 | G:A | 0.45  | 0.449 | 0.001 |
| 167 | rs6499660  | 52583705 | T:A | 0.319 | 0.31  | 0.009 |
| 168 | rs6499661  | 52584182 | C:T | 0.122 | 0.163 | 0.041 |
| 169 | rs1420571  | 52584994 | T:C | 0.105 | 0.116 | 0.011 |
| 170 | rs12596210 | 52585472 | T:C | 0.057 | 0.076 | 0.019 |
| 171 | rs11864881 | 52586805 | C:A | 0.387 | 0.419 | 0.032 |
| 172 | rs11076013 | 52587029 | G:A | 0.409 | 0.383 | 0.026 |
| 173 | rs1966435  | 52588027 | G:A | 0.13  | 0.194 | 0.064 |
| 174 | rs8061928  | 52588837 | C:T | 0.259 | 0.182 | 0.077 |
| 175 | rs8047473  | 52590063 | C:T | 0.323 | 0.327 | 0.004 |
| 176 | rs7193917  | 52590586 | T:C | 0.141 | 0.236 | 0.095 |
| 177 | rs13334214 | 52592442 | C:T | 0.414 | 0.382 | 0.032 |

|     |            |          |     |       |       |       |
|-----|------------|----------|-----|-------|-------|-------|
| 178 | rs13335453 | 52593744 | G:T | 0.272 | 0.373 | 0.101 |
| 179 | rs4784338  | 52595472 | G:T | 0.05  | 0.128 | 0.078 |
| 180 | rs4784339  | 52597179 | A:G | 0.28  | 0.301 | 0.021 |
| 181 | rs9922370  | 52598417 | A:G | 0.299 | 0.283 | 0.016 |
| 182 | rs1125338  | 52599280 | T:C | 0.12  | 0.169 | 0.049 |
| 183 | rs8049988  | 52599542 | A:G | 0.284 | 0.246 | 0.038 |
| 184 | rs17226942 | 52601015 | G:A | 0.2   | 0.148 | 0.052 |
| 185 | rs1345390  | 52602016 | A:G | 0.264 | 0.325 | 0.061 |
| 186 | rs16945092 | 52606975 | G:A | 0.038 | 0.032 | 0.006 |
| 187 | rs1861552  | 52607753 | A:C | 0.124 | 0.21  | 0.086 |
| 188 | rs7190483  | 52608058 | C:T | 0.37  | 0.283 | 0.087 |
| 189 | rs7196211  | 52608150 | T:C | 0.426 | 0.33  | 0.096 |
| 190 | rs7191750  | 52608341 | A:G | 0.061 | 0.051 | 0.01  |
| 191 | rs10153154 | 52610386 | C:T | 0.339 | 0.341 | 0.002 |
| 192 | rs7186220  | 52611296 | G:A | 0.431 | 0.357 | 0.074 |
| 193 | rs9929796  | 52613292 | A:G | 0.058 | 0.039 | 0.019 |
| 194 | rs7194243  | 52613660 | C:T | 0.43  | 0.365 | 0.065 |
| 195 | rs7195994  | 52617706 | G:A | 0.483 | 0.373 | 0.11  |
| 196 | rs2302674  | 52618095 | G:A | 0.494 | 0.593 | 0.099 |
| 197 | rs1136002  | 52618642 | C:T | 0.255 | 0.336 | 0.081 |
| 198 | rs860713   | 52626966 | G:A | 0.212 | 0.272 | 0.06  |
| 199 | rs2192872  | 52632128 | C:T | 0.149 | 0.239 | 0.09  |
| 200 | rs16952906 | 52640668 | T:C | 0.08  | 0.095 | 0.015 |
| 201 | rs1078013  | 52643195 | A:T | 0.478 | 0.569 | 0.091 |
| 202 | rs1076467  | 52643426 | T:C | 0.362 | 0.477 | 0.115 |
| 203 | rs11076015 | 52644081 | C:T | 0.07  | 0.113 | 0.043 |
| 204 | rs7187423  | 52647996 | G:A | 0.191 | 0.198 | 0.007 |
| 205 | rs12447427 | 52648090 | A:G | 0.18  | 0.115 | 0.065 |
| 206 | rs856973   | 52650682 | G:T | 0.213 | 0.143 | 0.07  |
| 207 | rs8049933  | 52651631 | C:T | 0.458 | 0.425 | 0.033 |
| 208 | rs1558687  | 52653366 | C:T | 0.181 | 0.207 | 0.026 |
| 209 | rs1861359  | 52654119 | G:A | 0.056 | 0.046 | 0.01  |
| 210 | rs2689247  | 52654660 | G:A | 0.184 | 0.119 | 0.065 |
| 211 | rs2003583  | 52657507 | G:A | 0.28  | 0.266 | 0.014 |
| 212 | rs1108086  | 52657870 | C:T | 0.41  | 0.491 | 0.081 |
| 213 | rs2075202  | 52658156 | T:G | 0.132 | 0.109 | 0.023 |
| 214 | rs12600060 | 52658962 | G:T | 0.006 | 0.061 | 0.055 |
| 215 | rs1420318  | 52660267 | T:C | 0.37  | 0.483 | 0.113 |
| 216 | rs16952987 | 52662001 | G:A | 0.212 | 0.23  | 0.018 |
| 217 | rs16952989 | 52662157 | C:T | 0.047 | 0.035 | 0.012 |
| 218 | rs2540766  | 52663472 | G:A | 0.257 | 0.226 | 0.031 |
| 219 | rs8057424  | 52663962 | G:A | 0.309 | 0.244 | 0.065 |
| 220 | rs7201705  | 52664456 | C:T | 0.047 | 0.028 | 0.019 |
| 221 | rs2540769  | 52665463 | C:A | 0.308 | 0.425 | 0.117 |
| 222 | rs7199185  | 52671108 | G:A | 0.417 | 0.347 | 0.07  |
| 223 | rs7199638  | 52671380 | G:A | 0.132 | 0.108 | 0.024 |

|     |            |          |     |       |       |       |
|-----|------------|----------|-----|-------|-------|-------|
| 224 | rs967515   | 52671718 | G:A | 0.047 | 0.075 | 0.028 |
| 225 | rs708262   | 52672030 | G:T | 0.402 | 0.379 | 0.023 |
| 226 | rs13335622 | 52672527 | A:T | 0.103 | 0.076 | 0.027 |
| 227 | rs708260   | 52672744 | G:A | 0.452 | 0.367 | 0.085 |
| 228 | rs12599672 | 52673577 | T:A | 0.169 | 0.18  | 0.011 |
| 229 | rs708257   | 52674423 | T:C | 0.352 | 0.273 | 0.079 |
| 230 | rs2665273  | 52676784 | C:T | 0.399 | 0.314 | 0.085 |
| 231 | rs1008400  | 52677393 | T:C | 0.461 | 0.469 | 0.008 |
| 232 | rs11076017 | 52677885 | C:T | 0.123 | 0.203 | 0.08  |
| 233 | rs11646512 | 52678453 | A:G | 0.438 | 0.447 | 0.009 |
| 234 | rs708253   | 52680918 | C:T | 0.44  | 0.35  | 0.09  |
| 235 | rs708251   | 52682397 | T:A | 0.154 | 0.242 | 0.088 |
| 236 | rs708250   | 52682541 | A:G | 0.373 | 0.511 | 0.138 |
| 237 | rs7197992  | 52683034 | C:T | 0.07  | 0.067 | 0.003 |
| 238 | rs8057572  | 52683399 | A:C | 0.23  | 0.221 | 0.009 |
| 239 | rs2665272  | 52684118 | G:A | 0.143 | 0.233 | 0.09  |
| 240 | rs2540771  | 52684799 | C:G | 0.334 | 0.271 | 0.063 |
| 241 | rs2665271  | 52685380 | G:A | 0.403 | 0.426 | 0.023 |
| 242 | rs17236708 | 52685927 | A:G | 0.156 | 0.209 | 0.053 |
| 243 | rs708249   | 52687130 | A:G | 0.262 | 0.219 | 0.043 |
| 244 | rs16953047 | 52687671 | G:T | 0.079 | 0.095 | 0.016 |
| 245 | rs708245   | 52688554 | A:G | 0.345 | 0.294 | 0.051 |
| 246 | rs718388   | 52690401 | C:T | 0.244 | 0.216 | 0.028 |
| 247 | rs741300   | 52691151 | T:C | 0.239 | 0.276 | 0.037 |
| 248 | rs12927155 | 52691301 | C:T | 0.125 | 0.114 | 0.011 |
| 249 | rs12445828 | 52692303 | C:T | 0.226 | 0.204 | 0.022 |
| 250 | rs2540775  | 52694760 | G:A | 0.383 | 0.323 | 0.06  |
| 251 | rs2689269  | 52696065 | G:A | 0.457 | 0.489 | 0.032 |
| 252 | rs2689270  | 52696316 | A:G | 0.109 | 0.09  | 0.019 |
| 253 | rs1123817  | 52696998 | G:A | 0.081 | 0.074 | 0.007 |
| 254 | rs17236863 | 52699591 | G:T | 0.019 | 0.072 | 0.053 |
| 255 | rs16953065 | 52701336 | A:G | 0.06  | 0.061 | 0.001 |
| 256 | rs708278   | 52702426 | G:A | 0.376 | 0.374 | 0.002 |
| 257 | rs16953075 | 52705969 | C:T | 0.231 | 0.152 | 0.079 |
| 258 | rs1588413  | 52707033 | C:T | 0.028 | 0.058 | 0.03  |
| 259 | rs714461   | 52707909 | T:A | 0.006 | 0.033 | 0.027 |
| 260 | rs11076022 | 52708479 | A:G | 0.093 | 0.151 | 0.058 |
| 261 | rs8053279  | 52708680 | G:A | 0.321 | 0.374 | 0.053 |
| 262 | rs12597712 | 52710121 | G:C | 0.221 | 0.263 | 0.042 |

Supplementary Table 2.

Proportion of pair wise  $r^2$  values exceeding selected thresholds

| Population | No. (Percentage) |                  |
|------------|------------------|------------------|
|            | $r^2 > 0.2^*$    | $r^2 > 0.8^{**}$ |
| WA         | 273 (2.65)       | 9 (0.09)         |
| AA         | 269 (2.61)       | 9 (0.09)         |
| YRI        | 359 (3.49)       | 8 (0.08)         |
| CEU        | 709 (6.89)       | 118 (1.15)       |
| CHB        | 694 (6.74)       | 145 (1.41)       |
| JPT        | 942 (9.15)       | 159 (1.54)       |

Based on the same 10296 pair-wise comparisons for common SNPs with MAF  $\geq 0.05$  in all 6 Populations

\*No significant difference between the two groups in the present study WA-AA ( $p=0.862$ ), but each differs from the CEU, CHB and YRI groups ( $p < 0.0001$ )

\*\* No significant difference between the two groups in the present study WA-AA ( $p=1.00$ ), or between each with the YRI ( $p=0.808$ ) but each differs from the CEU, CHB and YRI groups ( $p < 0.0001$ )

Supplementary Table 3. Replication of FTO associated SNPs in the two study samples

| SNP        | Study                | West Africans                 | African Americans             | MAF (West Africans) | MAF (African Americans) | MAF (HapMap CEU) |
|------------|----------------------|-------------------------------|-------------------------------|---------------------|-------------------------|------------------|
|            |                      | p-values:<br>BMI<br>PFM<br>WC | p-values:<br>BMI<br>PFM<br>WC |                     |                         |                  |
| rs9939609  | Frayling et al. 2007 | 0.768                         | 0.136                         | A (0.504)           | A (0.467)               | T (0.55)         |
|            | WTCCC 2007           | 0.225                         | 0.714                         |                     |                         |                  |
|            | Witter 2008          | 0.786                         | 0.167                         |                     |                         |                  |
| rs1121980  | Hinney 2008          | 0.321                         | 0.123                         | T (0.491)           | T (0.467)               | T (0.475)        |
|            | Loos 2008            | <b>0.039*</b>                 | 0.921                         |                     |                         |                  |
|            | Renstrom 2009        | 0.206                         | 0.110                         |                     |                         |                  |
| rs17817449 | Do et al 2008        | 0.554                         | 0.151                         | G (0.409)           | G (0.396)               | G (0.447)        |
|            |                      | 0.089                         | 0.632                         |                     |                         |                  |
|            |                      | 0.306                         | 0.159                         |                     |                         |                  |
| rs7204609  | Wing et al 2009      | 0.302                         | 0.855                         | C (0.445)           | C (0.36)                | C (0.018)        |
|            |                      | <b>0.006*</b>                 | 0.683                         |                     |                         |                  |
|            |                      | 0.065                         | 0.631                         |                     |                         |                  |

Supplementary Table 4. FTO SNPs genotyped in the Gambian FTO study showing  $p < 0.05$  in the present study

| SNP        | Present study |            |               | Gambian FTO study* |         |      |
|------------|---------------|------------|---------------|--------------------|---------|------|
|            | P-value       | Trait      | Population    | MAF                | P (BMI) | MAF  |
| rs7204609  | 0.302         | BMI        | West Africans | 0.44               | 0.376   | 0.47 |
|            | 0.065         | Waist      |               |                    |         |      |
|            | <b>0.006</b>  | <b>PFM</b> |               |                    |         |      |
| rs17817288 | 0.268         | BMI        | West Africans | 0.40               | 0.876   | 0.38 |
|            | 0.082         | Waist      |               |                    |         |      |
|            | <b>0.006</b>  | <b>PFM</b> |               |                    |         |      |
| rs12447107 | 0.926         | BMI        | West Africans | 0.36               | 0.821   | 0.31 |
|            | 0.667         | Waist      |               |                    |         |      |
|            | <b>0.015</b>  | <b>PFM</b> |               |                    |         |      |

\*Hennig et al 2009.

**Supplementary Table 5. LD between rs9939609 and the best scoring intron 1 SNPs in main manuscript Table 2**

| SNP        | $r^2$ with rs9939609 |                   |            |            |
|------------|----------------------|-------------------|------------|------------|
|            | West Africans        | African-Americans | HapMap CEU | HapMap YRI |
| rs9933611  | 0.0001               | 0.0001            | 0.046      | 0.009      |
| rs8055197  | 0.009                | 0.051             | 0.582      | 0.032      |
| rs7204609  | 0.298                | 0.272             | 0.0008     | 0.329      |
| rs17817288 | 0.253                | 0.068             | 0.617      | 0.206      |
| rs16952520 | 0.337                | 0.223             | 0.021      | 0.349      |

**Supplementary Figure 1. Distribution of MAF differences ( ) of the FTO SNPs between the two populations**

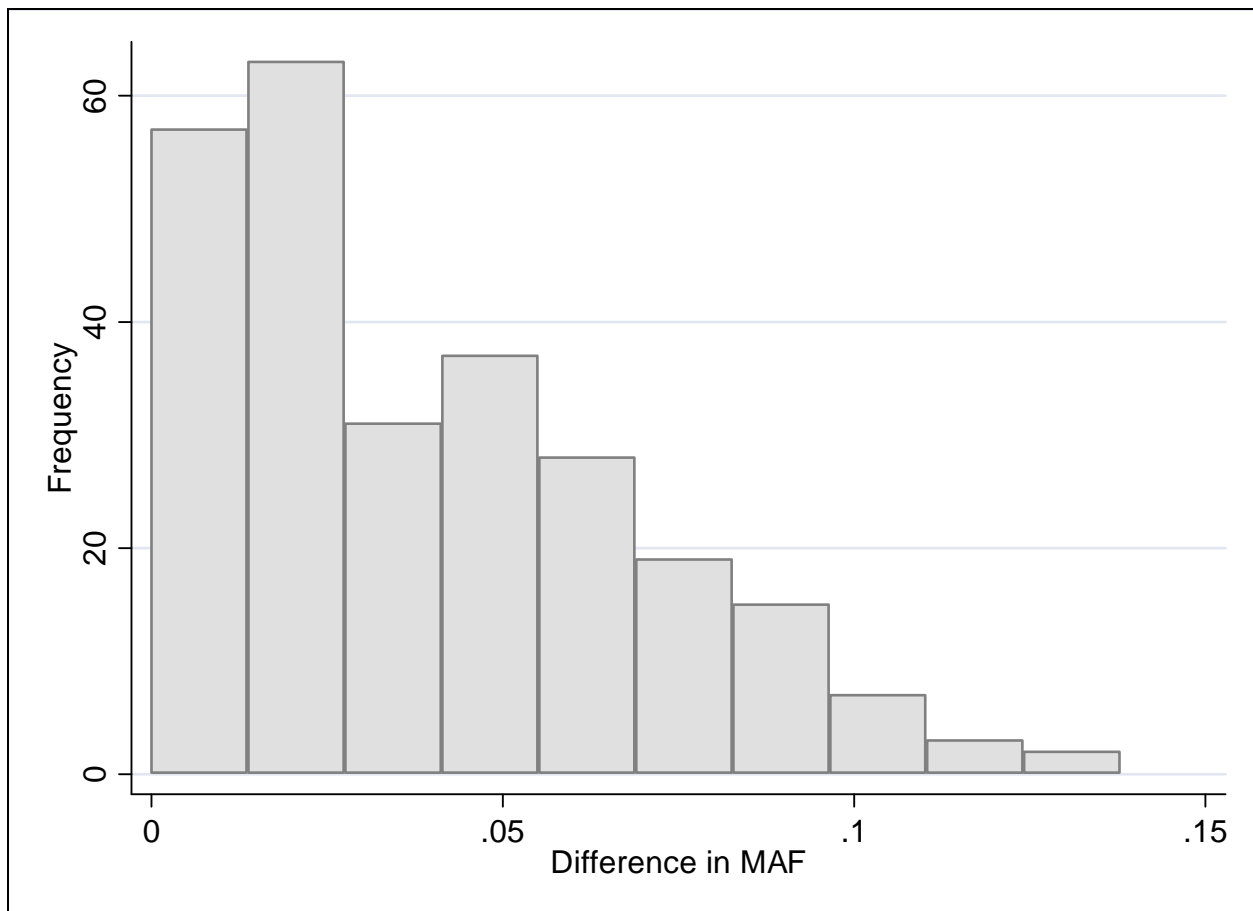



**Supplementary Figure 2. Number of pair-wise  $r^2$  values exceeding various thresholds in the present study and 4 HapMap samples (based on the same 10296 pair-wise comparisons for common SNPs with MAF  $\geq$  0.05 in all 6 populations)**

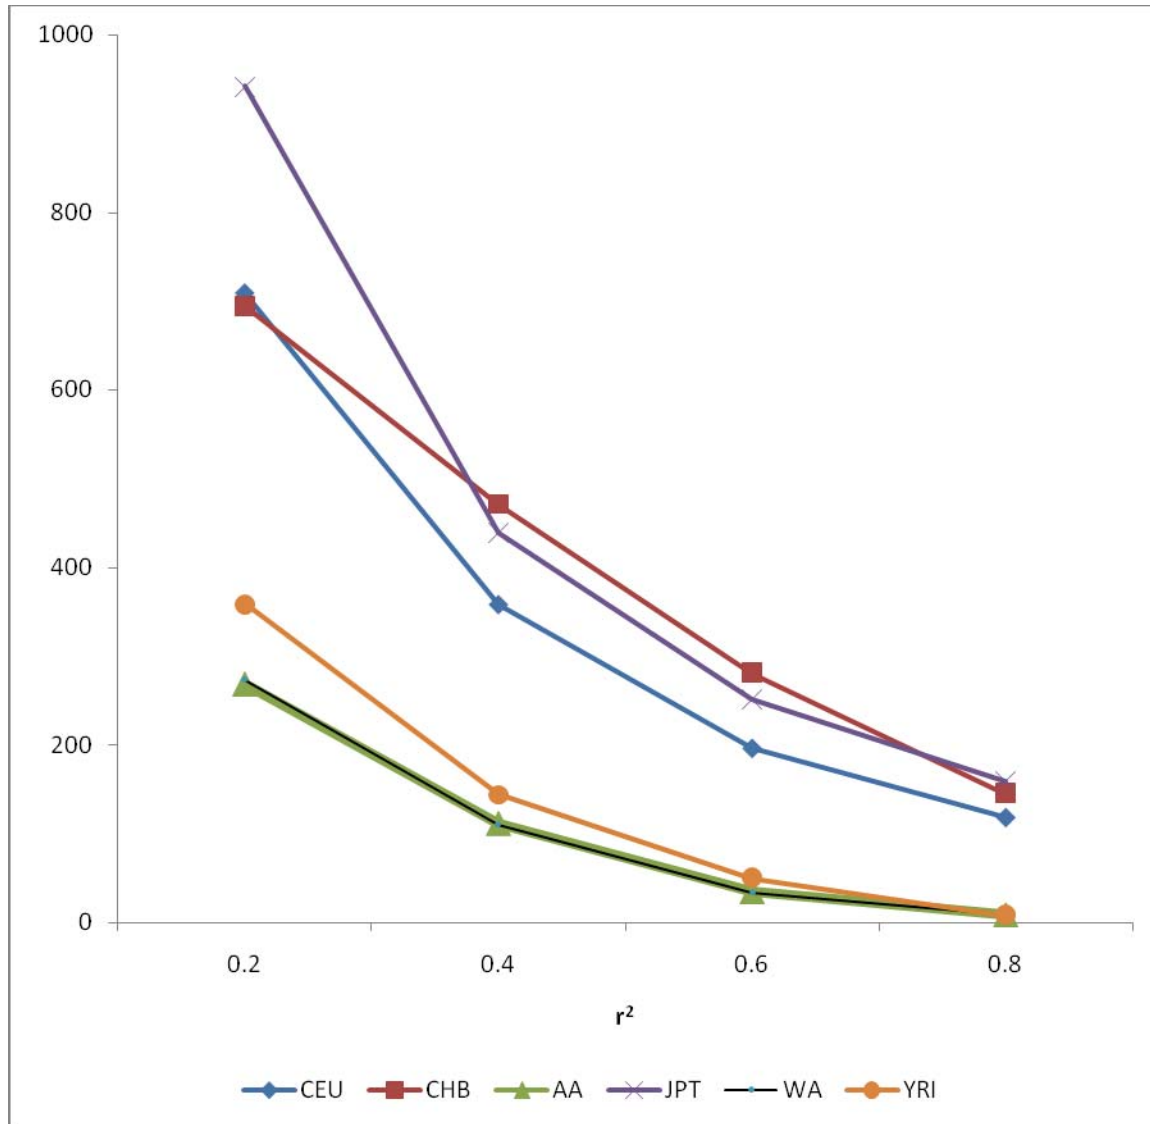

**Supplementary Figure 3. Gold heatmaps of 100kb region around rs9939609 in FTO gene using SNPs common to this study and HapMap rel #27 data for 4 populations**

African Americans (present study)

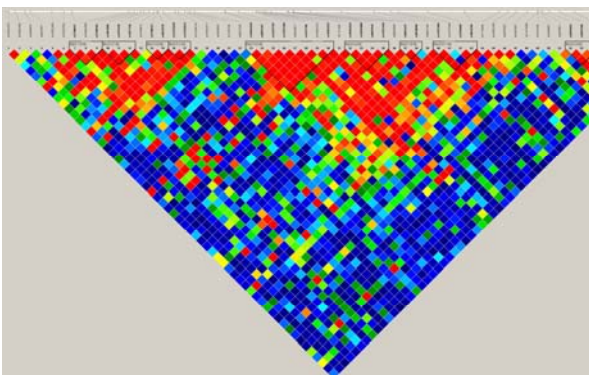

West Africans (present study)

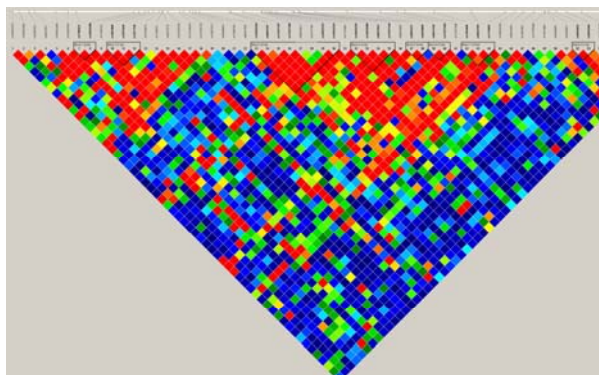

HapMap CEU

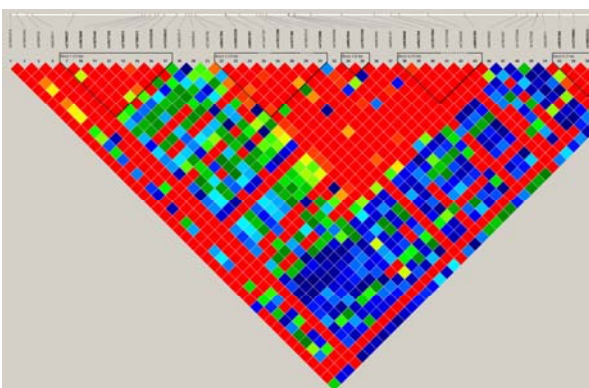

HapMap YRI

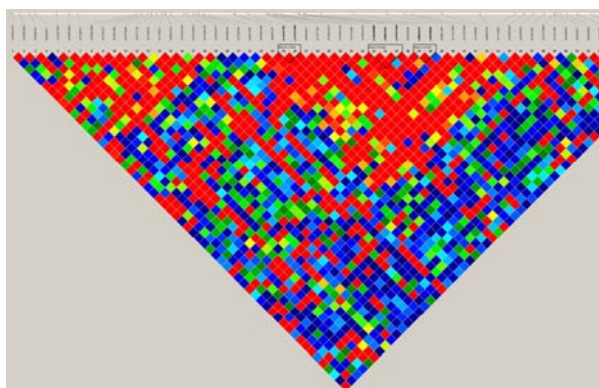

HapMap CHB

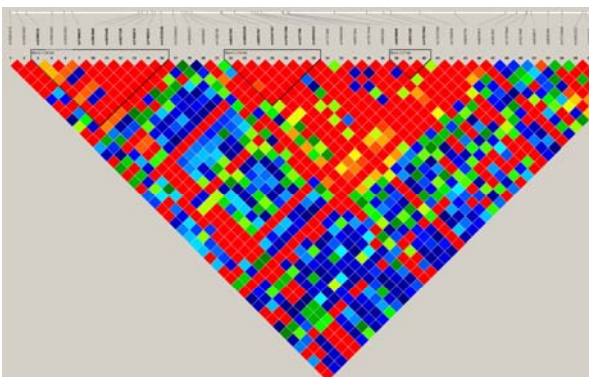

HapMap JPT

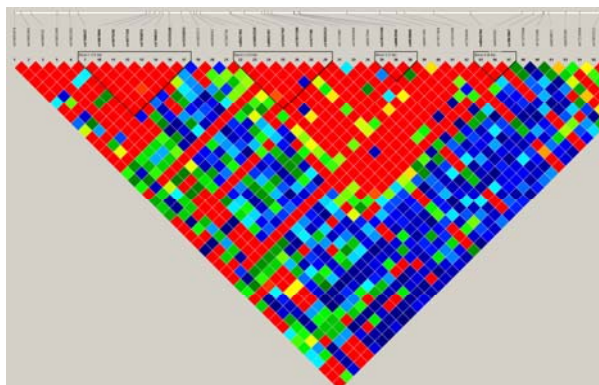

Supplement: supp_db09-1252_onlineappendix.pdf [file supp_db09-1252_onlineappendix.pdf]
